**FRANCIS MAITLAND BALFOUR.**

---

WE have to record the death of our beloved friend and colleague, FRANCIS MAITLAND BALFOUR, Fellow of Trinity College, Cambridge, for many years a contributor to, and co-editor of, this Journal.

His death was caused by a fall whilst he was attempting the ascent of the Aiguille de la Belle Etoile, on the south side of Mont Blanc, on July 19th last.

He was only thirty-one years of age.

The blow to our science and to the University of Cambridge, which had just founded a Professorship to do him honour, is overwhelming, and can be estimated by those who have followed his work in these pages.

Great as is the public loss, there is a deeper grief for those who knew him as a companion and fellow-worker, honouring him for his great mental powers and the firmness of will with which he applied them, loving him for his chivalrous courtesy and for the faithful and earnest nature which shewed itself in all he said and did. These must sorrow not now only, but through future years, as day after day they feel the need of his aid and fellowship.

*September, 1882.*
